# Supplementary figures and images for: Distinct roles for extracellular and intracellular domains in neuroligin function at inhibitory synapses
Source: eLife journal article supplement (doi:10.7554/elife.19236), 2016-11-02

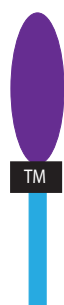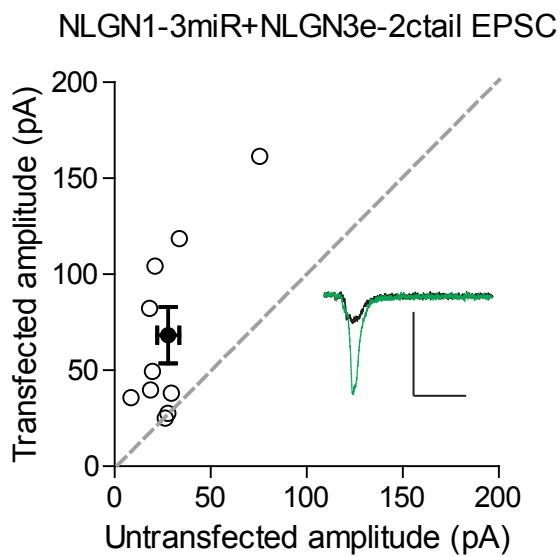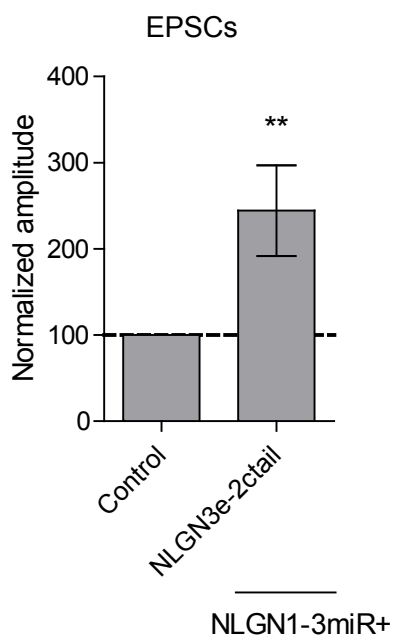

Figure 2 - figure supplement 1

Supplement: supp [file elife-19236-supp-v1.zip]

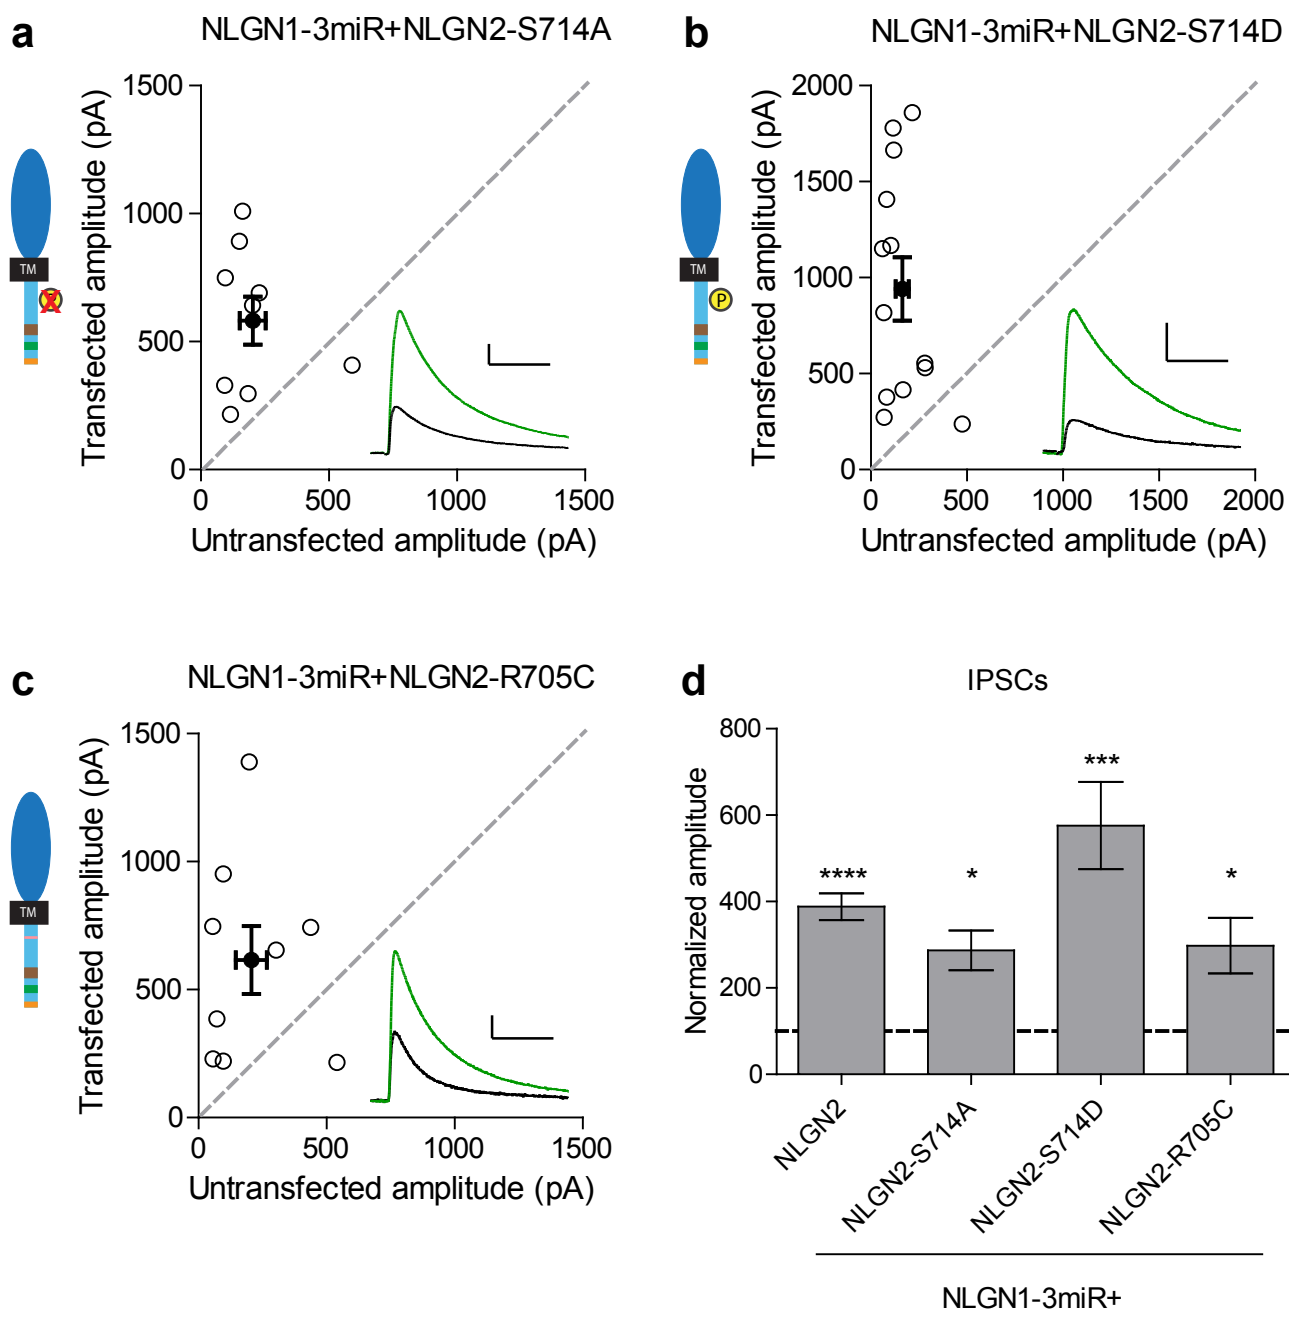

Figure 7 - figure supplement 1

Supplement: supp [file elife-19236-supp-v1.zip]

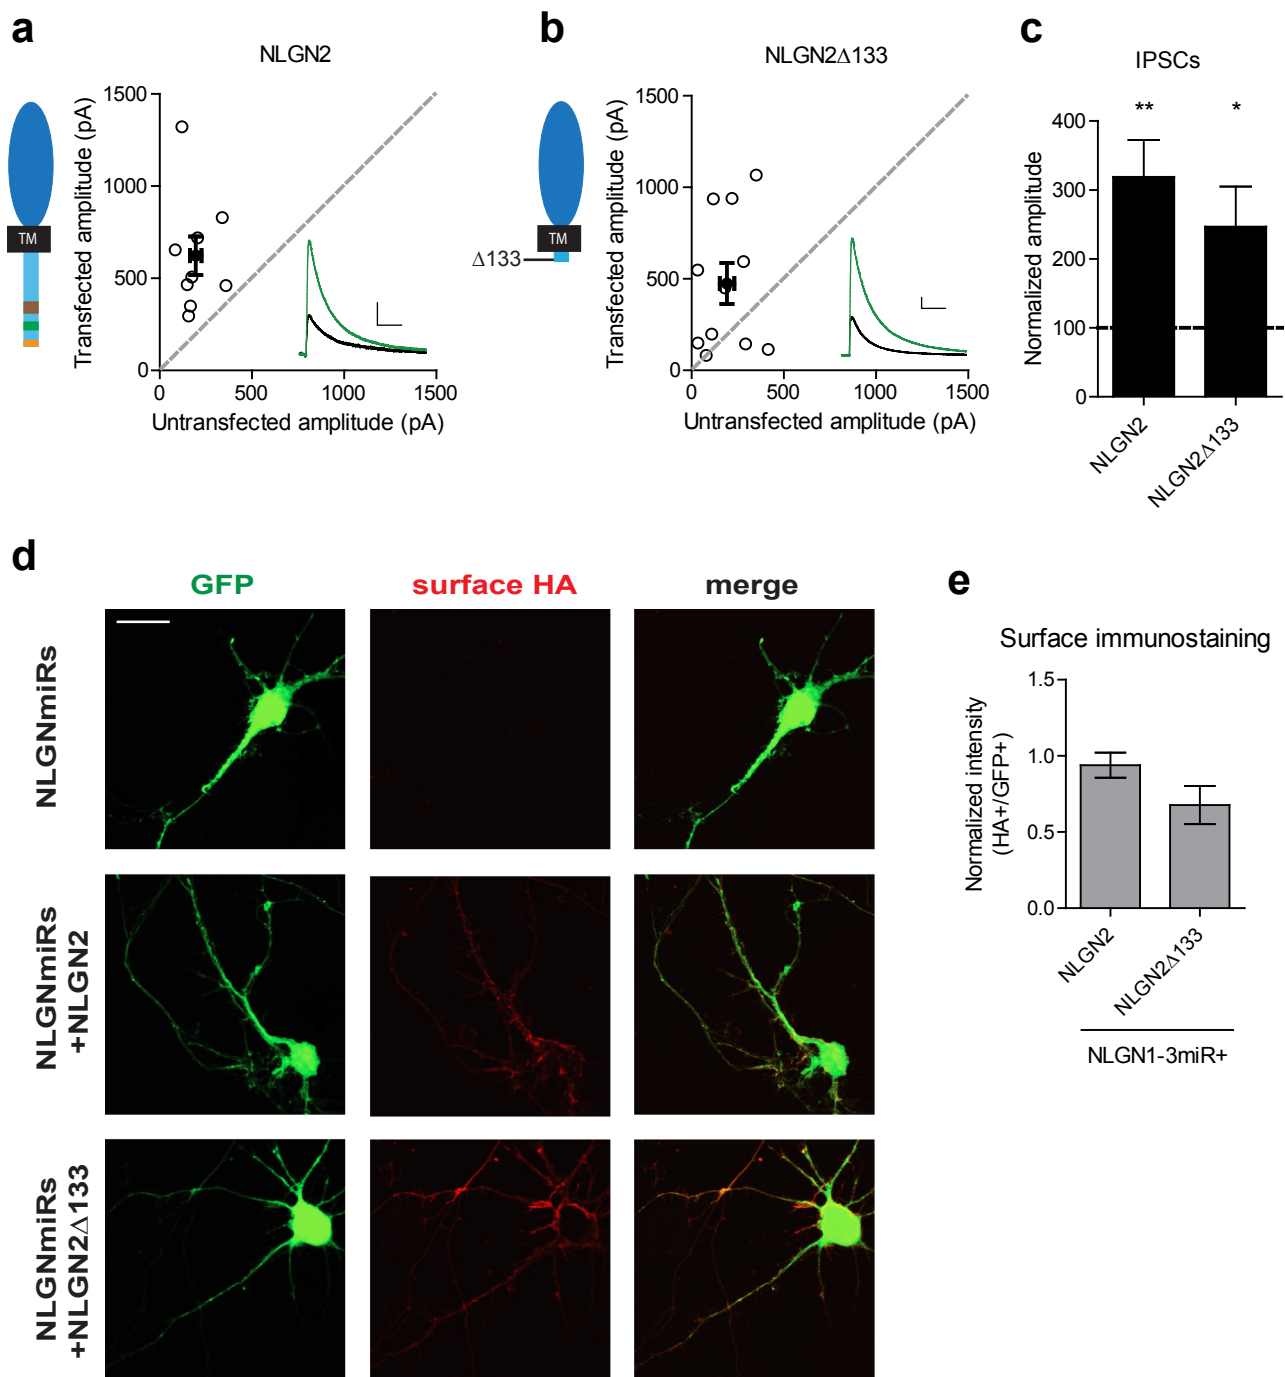

Figure 4 - figure supplement 1

Supplement: supp [file elife-19236-supp-v1.zip]

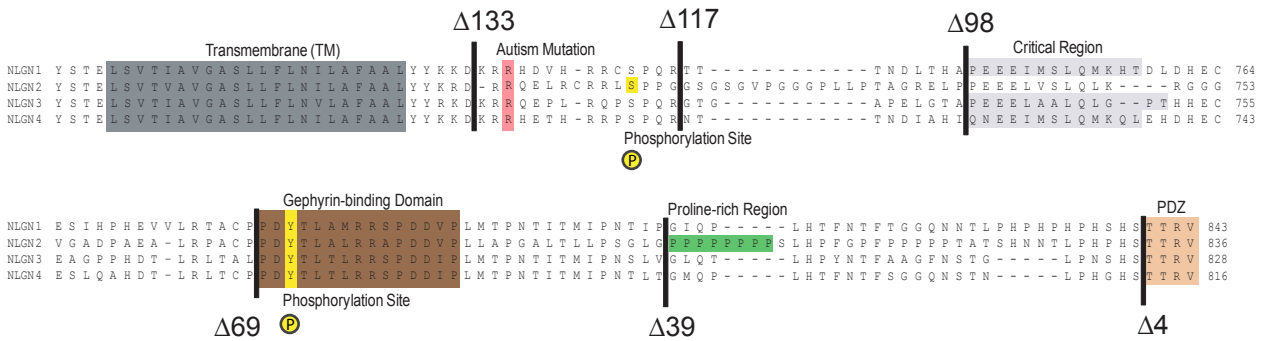

Figure 5 - figure supplement 1

Supplement: supp [file elife-19236-supp-v1.zip]

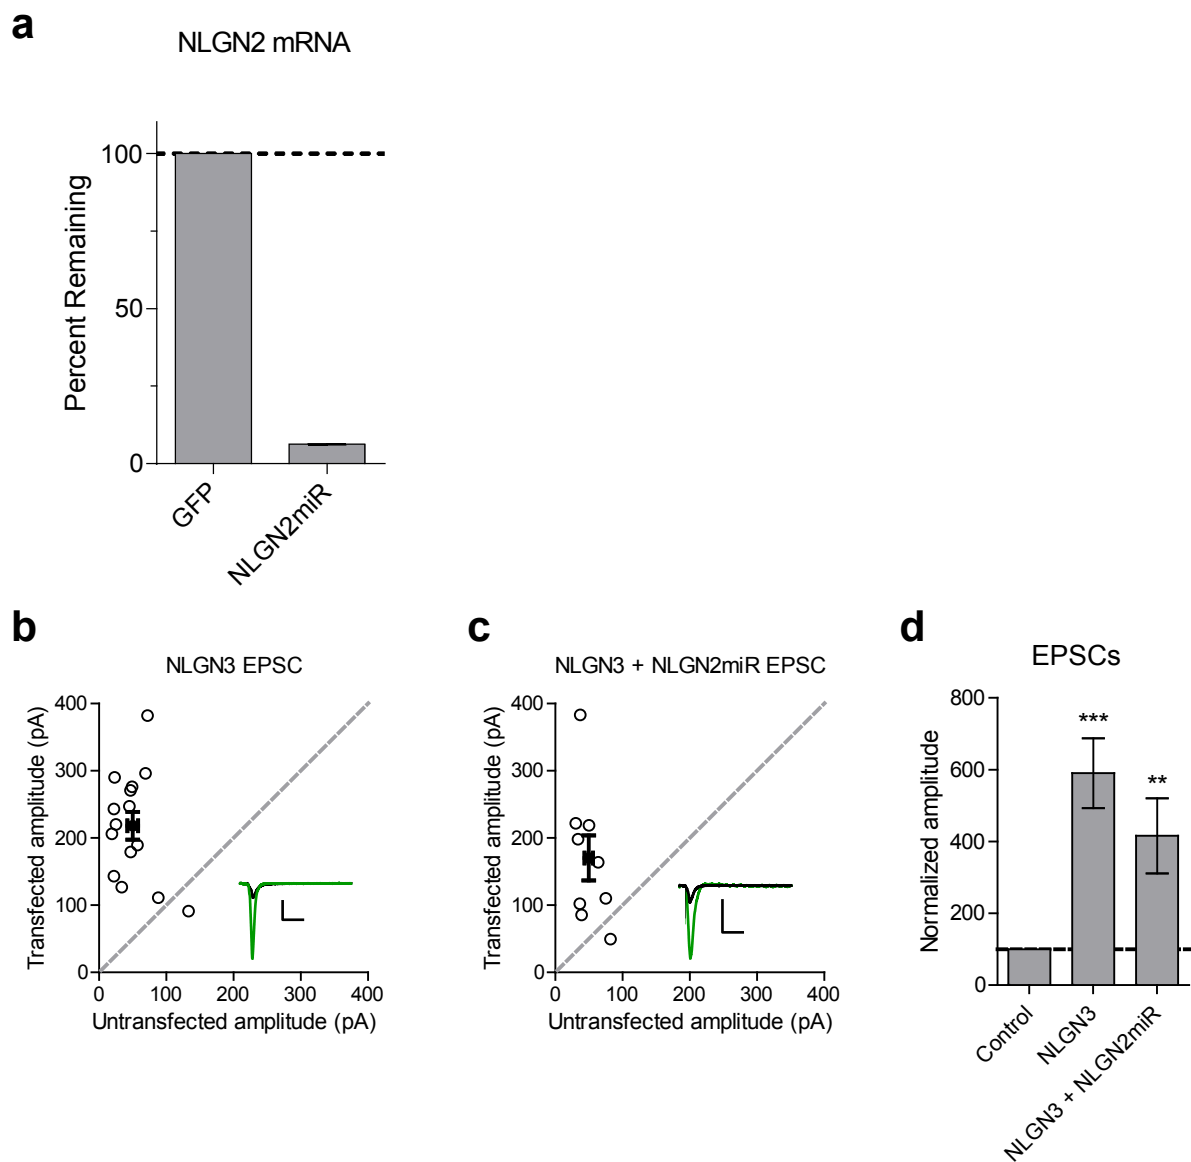

Figure 1 - figure supplement 1

Supplement: supp [file elife-19236-supp-v1.zip]

a

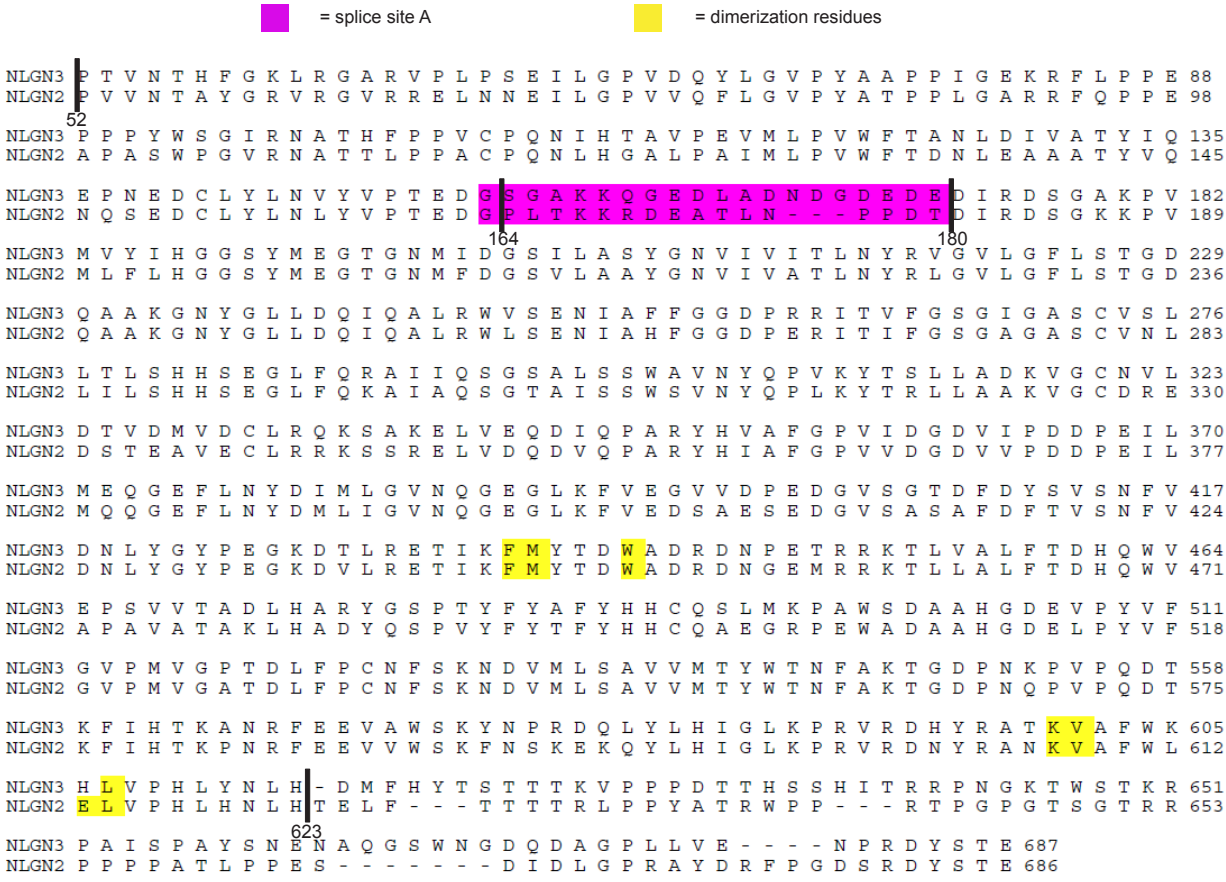

b

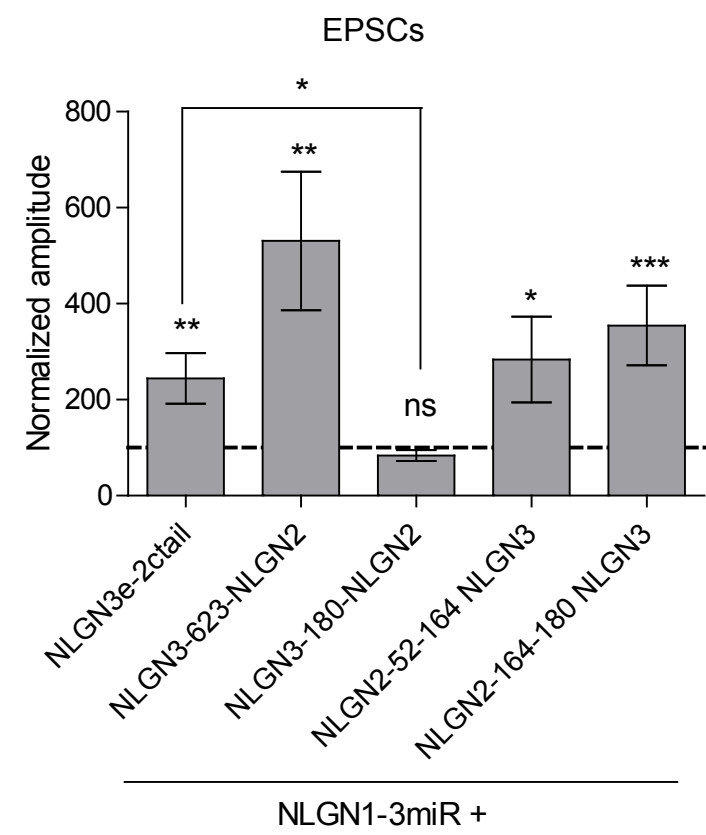

Figure 3 - figure supplement 1

Supplement: supp [file elife-19236-supp-v1.zip]

**a**

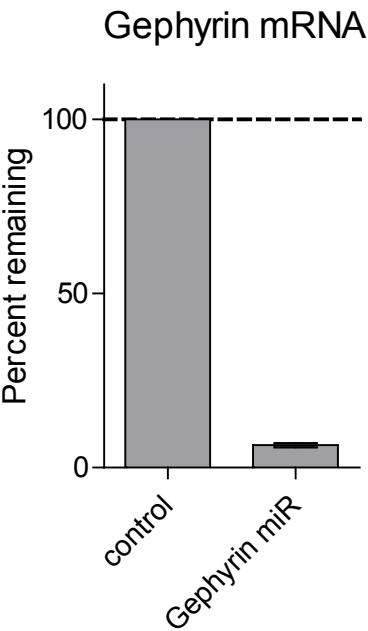

**b**

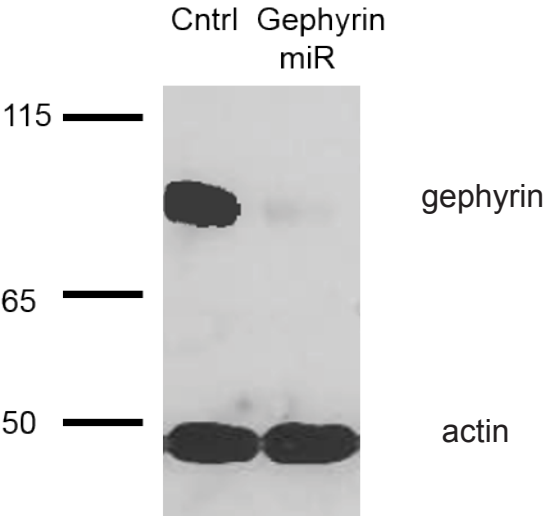

Figure 6 - figure supplement 1

Supplement: supp [file elife-19236-supp-v1.zip]
